# Supplementary material for: Psychological Interventions for Vaccine Injections in Young Children 0 to 3 Years: Systematic Review of Randomized Controlled Trials and Quasi-Randomized Controlled Trials
Source: PubMed Central journal article supplement — Clin J Pain. 2015 Sep 17;31(Suppl 10):S64–71. doi: 10.1097/AJP.0000000000000279 (PMC4900410; doi:10.1097/ajp.0000000000000279), 2015-09-17

## Revman Plots: Directed toy distraction child up to 3 yrs

### Distress Acute

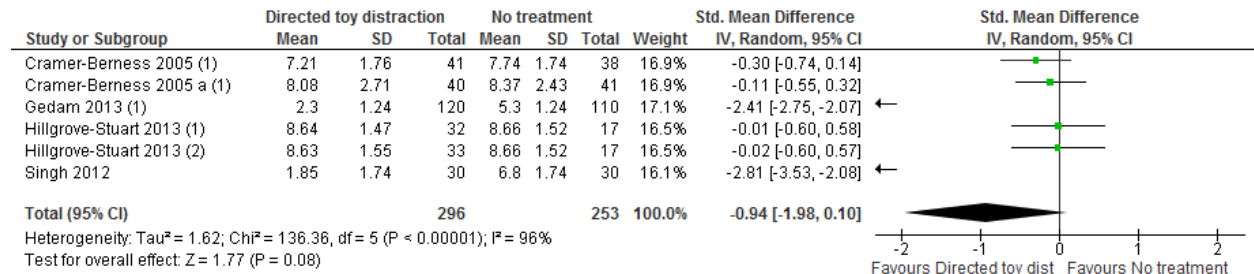

### Distress Acute + Recovery

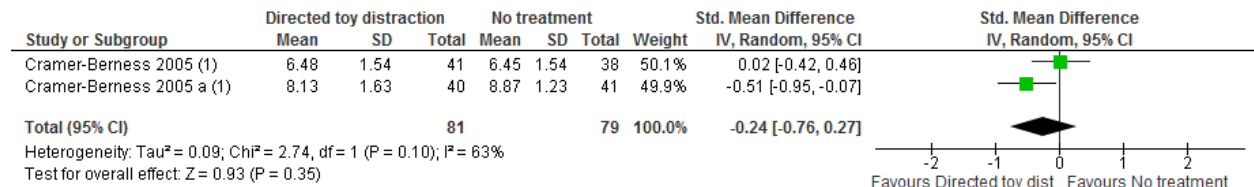

### Distress Recovery

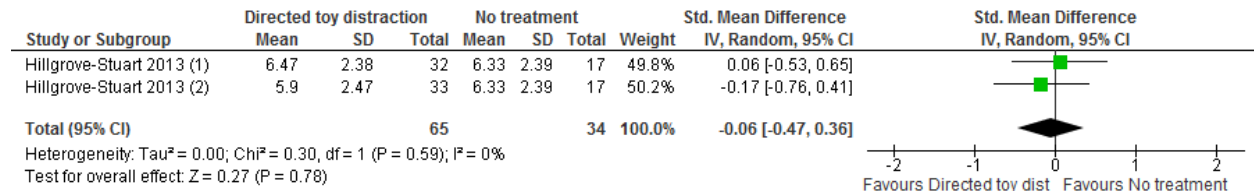

### Distress Pre-procedure (post-intervention)

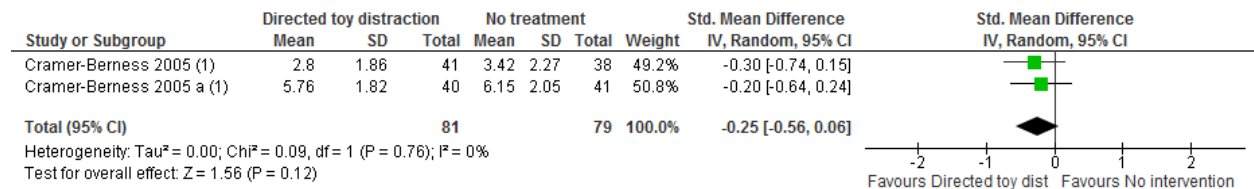

### Distress Pre-procedure + Acute + Recovery

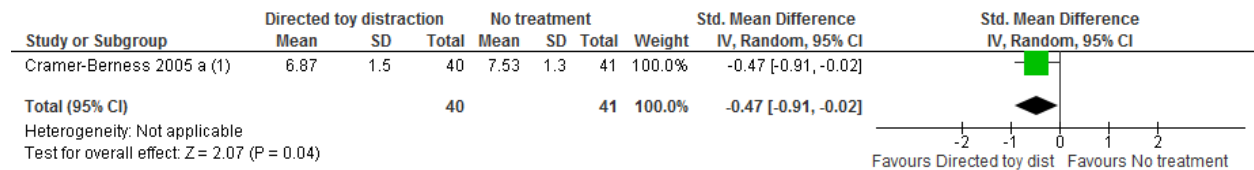

## Parent Fear Pre-procedure (post-intervention)

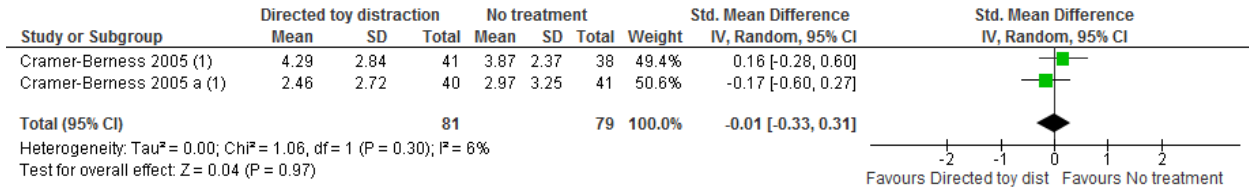

## Parent Fear

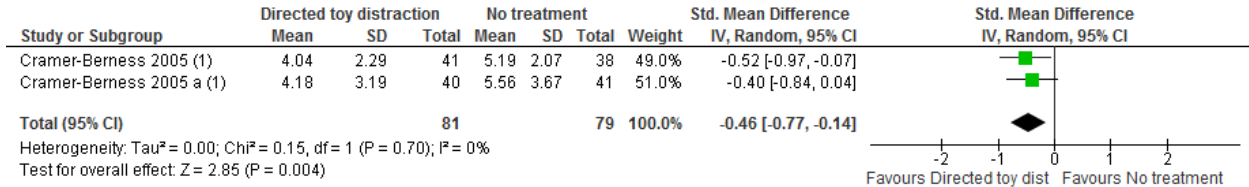

## Parent Use of Intervention (behaviour)

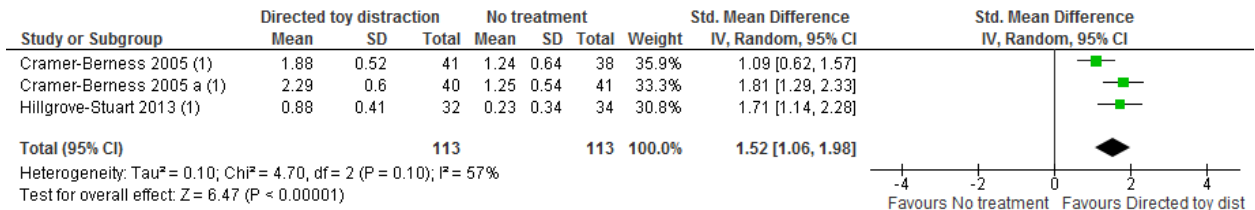

## Child Use of Intervention (behaviour)

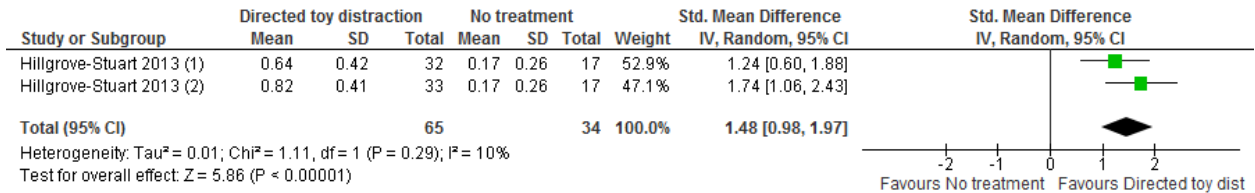

Supplement: ajp-31-s64-s002.pdf [file ajp-31-s64-s002.pdf]
